# Supplementary material for: Epidemiology of foot-and-mouth disease in Landhi Dairy Colony, Pakistan, the world largest Buffalo colony
Source: Springer Nature journal article supplement (doi:10.1186/1743-422x-5-53), 2008-04-29
Supplement: Additional file 1 [file 1743-422x-5-53-s1.pdf]

| Month          | No. farms | No. positive farms | farm-level prevalence | l.level | u.level |
|----------------|-----------|--------------------|-----------------------|---------|---------|
| April 2006     | 18        | 5                  | 28                    | 10      | 53      |
| May 2006       | 7         | 1                  | 14                    | 0       | 58      |
| June 2006      | 7         | 0                  | 0                     | 0       | 41      |
| July 2006      | 5         | 0                  | 0                     | 0       | 52      |
| August 2006    | 9         | 9                  | 100                   | 66      | 100     |
| September 2006 | 19        | 5                  | 26                    | 9       | 51      |
| October 2006   | 5         | 1                  | 20                    | 1       | 72      |
| November 2006  | 5         | 1                  | 20                    | 1       | 72      |
| December 2006  | 5         | 4                  | 80                    | 28      | 99      |
| January 2007   | 17        | 8                  | 47                    | 23      | 72      |
| February 2007  | 5         | 5                  | 100                   | 48      | 100     |
| March 2007     | 5         | 5                  | 100                   | 48      | 100     |
| April 2007     | 17        | 3                  | 18                    | 4       | 43      |

animal level

| Month          | No. animals sample | No. infected animals | Animal-level prevalence | l.level | u.level |
|----------------|--------------------|----------------------|-------------------------|---------|---------|
| April 2006     | 166                | 10                   | 6                       | 3       | 11      |
| May 2006       | 42                 | 6                    | 14                      | 5       | 29      |
| June 2006      | 42                 | 0                    | 0                       | 0       | 8       |
| July 2006      | 30                 | 0                    | 0                       | 0       | 12      |
| August 2006    | 30                 | 17                   | 57                      | 37      | 75      |
| September 2006 | 171                | 9                    | 5                       | 2       | 10      |
| October 2006   | 26                 | 1                    | 4                       | 0       | 20      |
| November 2006  | 30                 | 1                    | 3                       | 0       | 17      |
| December 2006  | 27                 | 14                   | 52                      | 32      | 71      |
| January 2007   | 172                | 18                   | 10                      | 6       | 16      |
| February 2007  | 30                 | 17                   | 57                      | 37      | 75      |
| March 2007     | 30                 | 15                   | 50                      | 31      | 69      |
| April 2007     | 164                | 4                    | 2                       | 1       | 6       |
